# Supplementary material for: Significant Impact of Sequence Variations in the Nucleoprotein on CD8 T Cell-Mediated Cross-Protection against Influenza A Virus Infections
Source: PLoS One. 2010 May 11;5(5):e10583. doi: 10.1371/journal.pone.0010583 (PMC2868023; doi:10.1371/journal.pone.0010583)
Supplement: Table S3 — Infectivity of the virus stocks used in the present study. (0.04 MB DOC) [file pone.0010583.s003.doc]

**Table S3. Infectivity** of the virus stocks used in the present study

| Strain | Subtype | HAU1 | EID502 | MID503 | LD503 |
| --- | --- | --- | --- | --- | --- |
| X31 | H3N2 | 1:1024 | 108.75 | 102.25 | n.d. |
| A/Memphis/102/1972 | H3N2 | 1:1024 | 109.5 | 102.50 | n.d. |
| A/NT/60/1968 | H3N2 | 1:1024 | 108.75 | 102.25 | n.d. |
| A/Taiwan/01/1986 | H1N1 | 1:512 | 108.25 | 101.75 | 4 x 105 |
| A/Puerto Rico/8/34 | H1N1 | 1:1024 | 109.5 | 101.5 | 1x 104 |

1 Hemagglutination Unit (HAU) was expressed as the highest dilution of a virus stock to cause hemagglutination of Turkey red blood cells in a 50 l of reaction volume.

250% Egg Infectious Dose (EID50) was defined as the highest dilution of a virus stock to infect 50 percent of 10-day old embryonated chicken egges.

350% MouseInfectious Dose (MID50) and 50% Lethal dose (LD50) were determined in C57BL/6 mice and expressed as EID50 required to give 1 MID50 and 1 LD50, respectively. n.d.: not determined.
